# Supplementary material
Source: PubMed Central journal article supplement (PMC2265461)

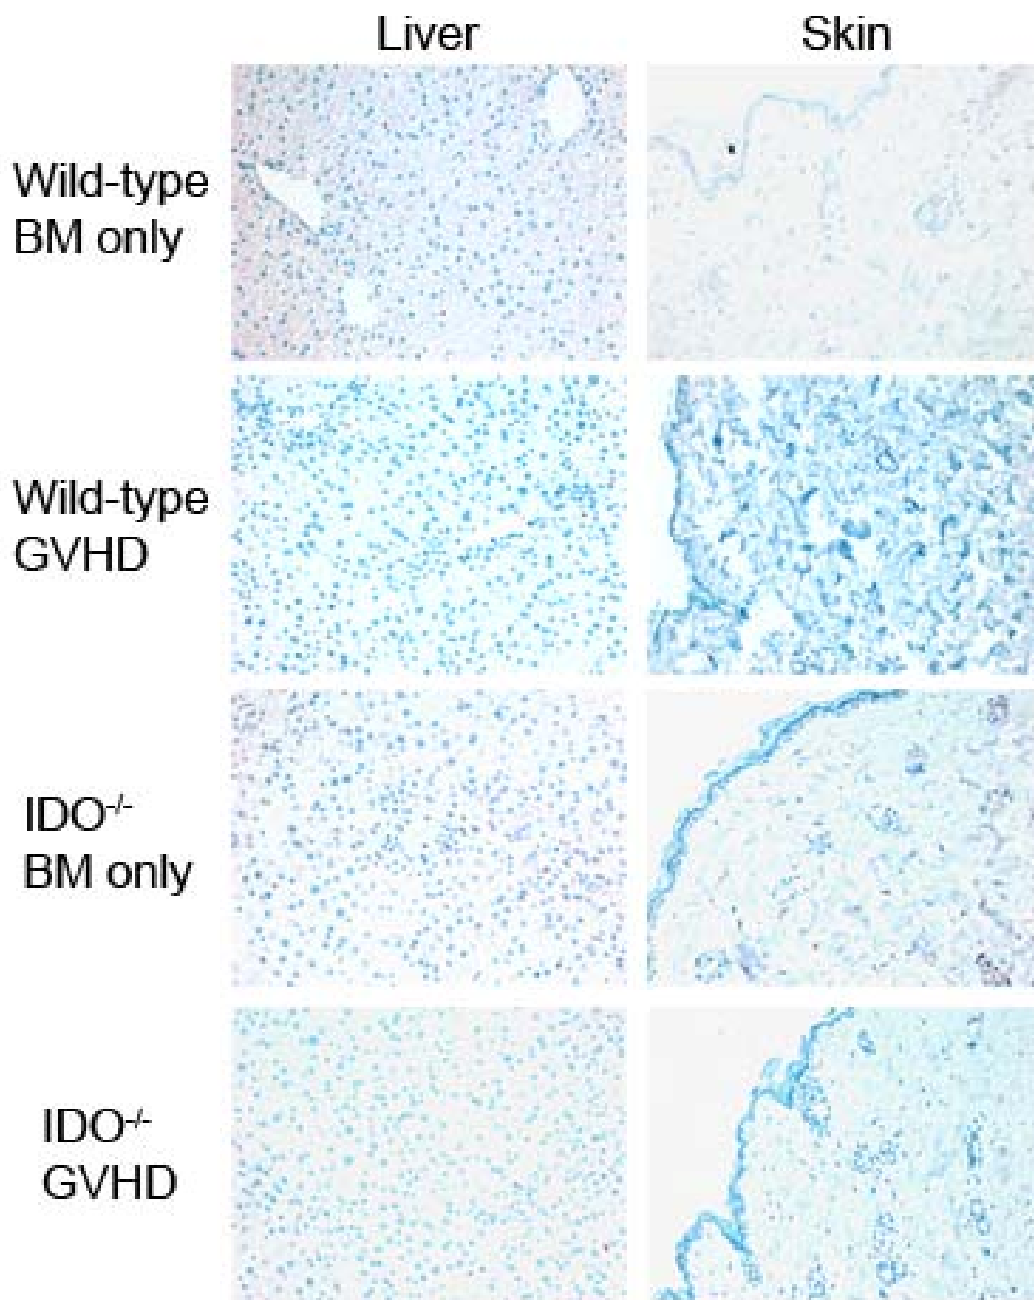

Supplement: blood_blood-2007-06-096081_1.pdf [file blood_blood-2007-06-096081_1.pdf]

wt BM only

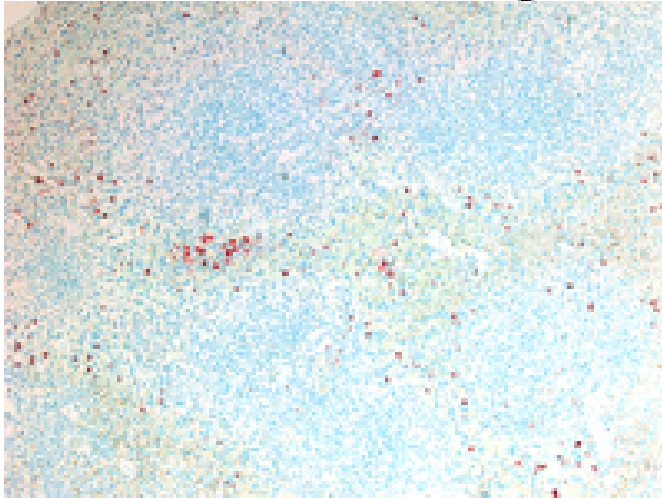

wt Day 7 GVHD

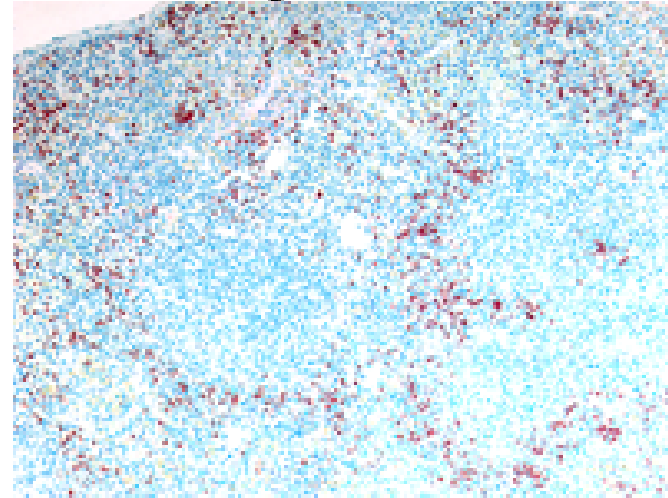

Supplement: blood_blood-2007-06-096081_2.pdf [file blood_blood-2007-06-096081_2.pdf]

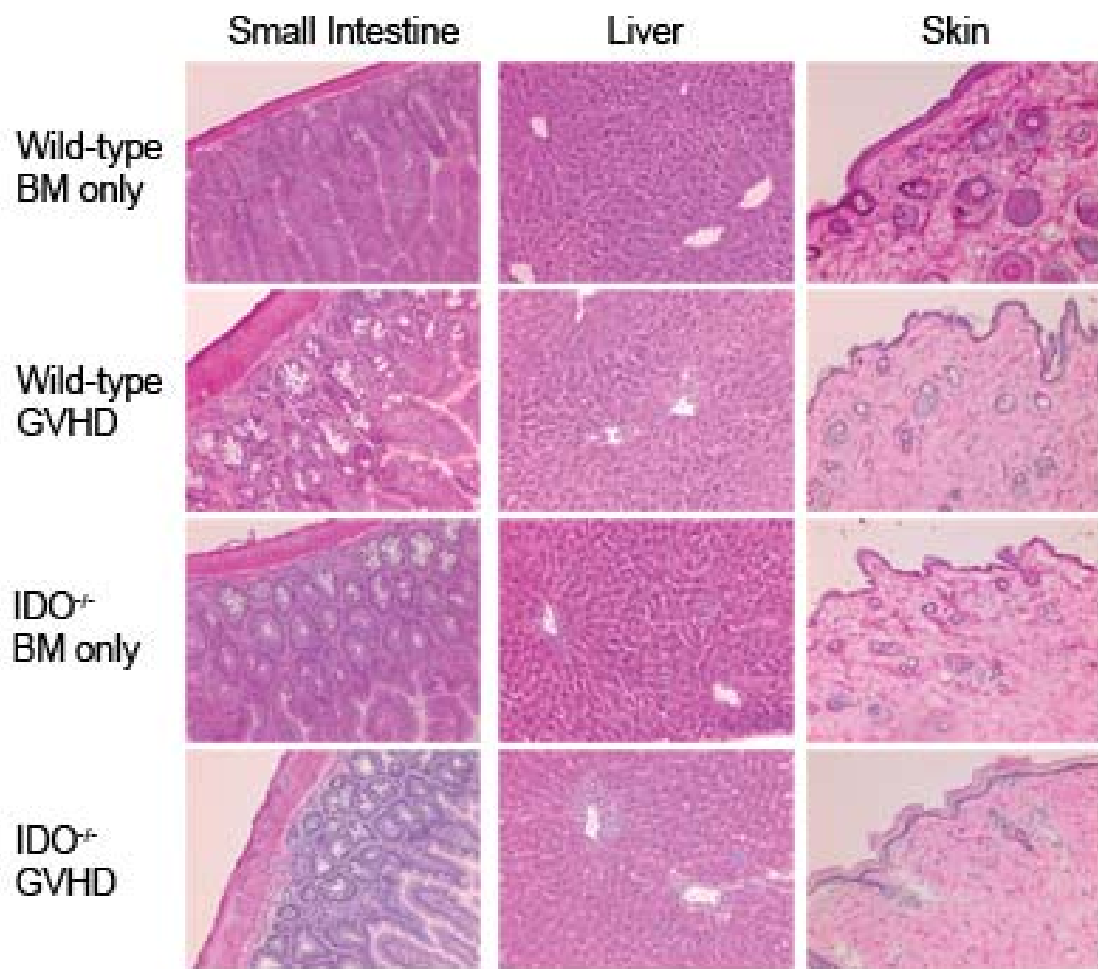

Supplement: blood_blood-2007-06-096081_3.pdf [file blood_blood-2007-06-096081_3.pdf]

A

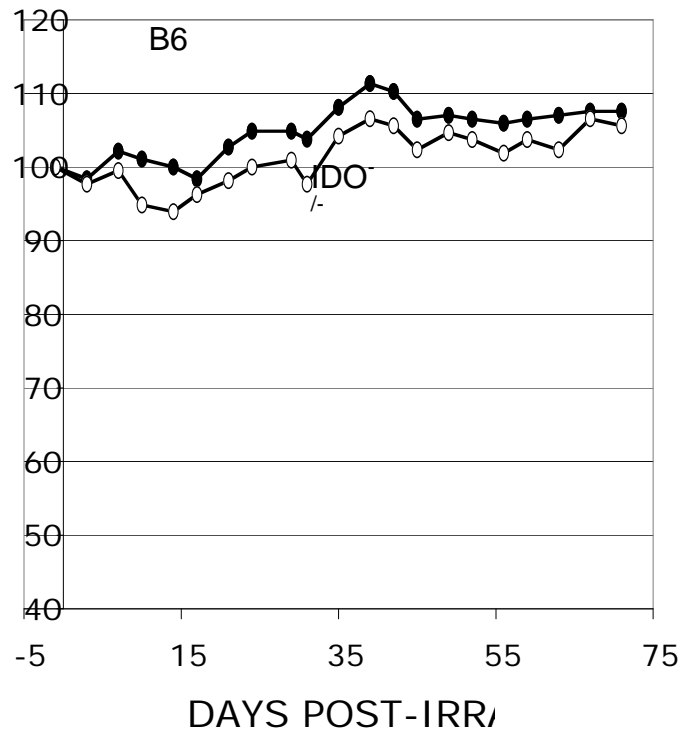

B

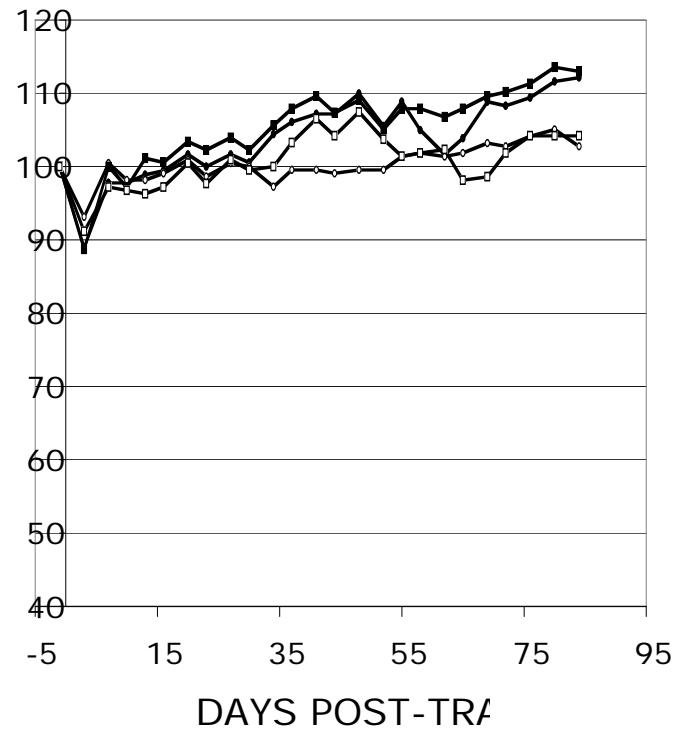

Supplement: blood_blood-2007-06-096081_4.pdf [file blood_blood-2007-06-096081_4.pdf]
